# Supplementary material for: Intensity of perinatal care, extreme prematurity and sensorimotor outcome at 2 years corrected age: evidence from the EPIPAGE-2 cohort study
Source: Springer Nature journal article supplement (doi:10.1186/s12916-018-1206-4), 2018-12-01
Supplement: MOESM2 [file 16317052]

## RESEARCH

# S2 Appendix: Multiple imputation methods

Andrei S Morgan<sup>1,2,3\*</sup>, Laurence Foix L'Helias<sup>1,4,5</sup>, Caroline Diguisto<sup>1,6,7</sup>, Laetitia Marchand-Martin<sup>1</sup>, Monique Kaminski<sup>1</sup>, Babak Khoshnood<sup>1</sup>, Jennifer Zeitlin<sup>1</sup>, Gérard Bréart<sup>1</sup>, Xavier Durrmeyer<sup>1,8</sup>, François Goffinet<sup>1,9</sup> and Pierre-Yves Ancel<sup>1,10</sup>

\*Correspondence:

[andrei.morgan@inserm.fr](mailto:andrei.morgan@inserm.fr)

<sup>1</sup>INSERM UMR 1153, Obstetrical, Perinatal and Pediatric Epidemiology Research Team (EPOPé), Centre for Epidemiology and Statistics Sorbonne Paris Cité, DHU Risks in Pregnancy, Paris Descartes University, Hôpital Tenon, Rue de la Chine, 75020 Paris, France

Full list of author information is available at the end of the article

We used multiple imputation due to incomplete responses in physician questionnaires at two years of age. This was performed using chained equations with the R package ‘mice’, [1] imputing data for outcomes and other covariates. Imputation model variables included the exposure, two year outcomes (sensorimotor disability and survival status), maternal variables (age, parity, country of birth, socioeconomic status), pregnancy variables (fertility treatment, multiple status, fetal sex, chorioamnionitis, prolonged rupture of membranes, spontaneous labour, gestational age at delivery), birth weight z-score, neonatal morbidities (bronchopulmonary dysplasia, necrotising enterocolitis and retinopathy of prematurity) as well as usage of postnatal steroids, whether the baby received maternal breast milk at discharge, and whether there was a severe congenital brain malformation. We also included data relating to the five domains (communication, gross motor, fine motor, problem-solving and personal-social) of the Ages and Stages Questionnaire (ASQ) [2] if completed between 22 and 26 months corrected age in children without cerebral palsy or neurosensory impairment (deafness and blindness), and who did not have a severe brain malformation. Data for sensorimotor deficiency and ASQ status were only imputed for children who survived to two years of age. We generated 60 independent data sets using 30 iterations each; data were pooled according to Rubin’s rule. [3]

## Author details

<sup>1</sup>INSERM UMR 1153, Obstetrical, Perinatal and Pediatric Epidemiology Research Team (EPOPé), Centre for Epidemiology and Statistics Sorbonne Paris Cité, DHU Risks in Pregnancy, Paris Descartes University, Hôpital Tenon, Rue de la Chine, 75020 Paris, France. <sup>2</sup>Institute for Womens’ Health, UCL, 74 Huntley Street, WC1E 6AU, London, UK. <sup>3</sup>SAMU 93 - SMUR Pédiatrique, CHI André Gregoire, Groupe Hospitalier Universitaire Paris Seine-Saint-Denis, Assistance Publique des Hôpitaux de Paris, Montreuil, France. <sup>4</sup>UPMC Université Paris 6, Sorbonne Universités, Paris, France. <sup>5</sup>Service de Néonatalogie, Hopital Armand Trousseau, Assistance Publique des Hôpitaux de Paris, Paris, France. <sup>6</sup>Maternité Olympe de Gouges, Centre Hospitalier Regional Universitaire Tours, Tours, France. <sup>7</sup>Université François Rabelais, Tours, France. <sup>8</sup>Service de Médecine Néonatale, Centre Hospitalier Intercommunal de Creteil, Clinical Research Center CHI Créteil, Créteil, France. <sup>9</sup>Maternité Port-Royal, University Paris-Descartes, Hôpitaux Universitaires Paris Centre, Assistance Publique des Hôpitaux de Paris, Paris, France. <sup>10</sup>URC CIC P1419, DHU Risk in Pregnancy, Cochin Hotel Dieu, Assistance Publique des Hôpitaux de Paris, Paris, France.

## References

- van Buuren, S., Groothuis-Oudshoorn, K.: mice: Multivariate Imputation by Chained Equations in R. *Journal of Statistical Software, Articles* **45**(3), 1–67 (2011). doi:[10.18637/jss.v045.i03](https://doi.org/10.18637/jss.v045.i03)
- Squires, J., Bricker, D., Twombly, E., Nickel, R., Clifford, J., Murphy, K., Hoselton, R., Potter, L., Mounts, L., Farrell, J.: *Ages & Stages Questionnaires, Third Edition (ASQ-3)*. Brookes Publishing, ??? (2009)
- Rubin, D.B.: *Multiple Imputation for Nonresponse in Surveys*. John Wiley & Sons, Inc., USA (1987). doi:[10.1002/9780470316696.fmatter](https://doi.org/10.1002/9780470316696.fmatter)

Table 1: Multiple imputation variables: methods and missingness

| Variable                                                | Variable type              | Model for data prediction | Percentage of values missing |             |                 |           |
|---------------------------------------------------------|----------------------------|---------------------------|------------------------------|-------------|-----------------|-----------|
|                                                         |                            |                           | fetuses                      | live births | NICU admissions | survivors |
| Hospital of birth                                       | Categorical                | No missing data           | 0%                           | 0%          | 0%              | 0%        |
| Intensity of perinatal care group                       | Categorical (3 categories) | No missing data           | 0%                           | 0%          | 0%              | 0%        |
| Survival status                                         | Categorical (6 categories) | No missing data           | 0%                           | 0%          | 0%              | 0%        |
| Gestational age (weeks)                                 | Numeric                    | No missing data           | 0%                           | 0%          | 0%              | 0%        |
| Multiple pregnancy status                               | Binary                     | No missing data           | 0%                           | 0%          | 0%              | 0%        |
| Fetal sex                                               | Binary                     | Logistic regression       | 0.6%                         | 0.1%        | 0%              | 0%        |
| Maternal age                                            | Categorical (4 categories) | Ordered logit model       | 0.6%                         | 0.2%        | 0%              | 0%        |
| Parents' socioeconomic status                           | Categorical (6 categories) | Multinomial logit model   | 11.5%                        | 9.6%        | 8.8%            | 6.6%      |
| Maternal fertility treatment                            | Binary                     | Logistic regression       | 3.8%                         | 3.6%        | 3.4%            | 3.4%      |
| Chorioamnionitis                                        | Binary                     | Logistic regression       | 16.2%                        | 11.8%       | 11.0%           | 10.1%     |
| Spontaneous labour                                      | Binary                     | Logistic regression       | 18.2%                        | 5.1%        | 4.2%            | 4.0%      |
| Birth weight z-score                                    | Numeric                    | Predictive mean matching  | 6.7%                         | 0.4%        | 0%              | 0%        |
| Premature rupture of membranes                          | Binary                     | Logistic regression       | 5.3%                         | 1.2%        | 0.7%            | 0.4%      |
| Maternal origin                                         | Binary                     | Logistic regression       | 7.0%                         | 5.2%        | 3.7%            | 1.3%      |
| Primiparous                                             | Binary                     | Logistic regression       | 1.0%                         | 1.2%        | 1.2%            | 1.3%      |
| Postnatal steroids                                      | Binary                     | Logistic regression       | 41.8%                        | 22.1%       | 4.3%            | 3.2%      |
| Severe bronchopulmonary dysplasia                       | Binary                     | Logistic regression       | 51.3%                        | 34.9%       | 20.1%           | 7.0%      |
| Severe necrotising enterocolitis                        | Binary                     | Logistic regression       | 41.0%                        | 21.0%       | 3.0%            | 0.6%      |
| Severe retinopathy of prematurity                       | Binary                     | Logistic regression       | 40.4%                        | 20.1%       | 1.9%            | 1.1%      |
| Breastmilk at discharge                                 | Binary                     | Logistic regression       | 59.9%                        | 46.5%       | 34.4%           | 8.0%      |
| Severe cerebral lesions                                 | Binary                     | Logistic regression       | 40.9%                        | 20.8%       | 2.8%            | 0.2%      |
| Sensorimotor deficiency at 2 years CA                   | Binary                     | Logistic regression       | 64.0%                        | 52.2%       | 41.4%           | 16.7%     |
| ASQ Communication score below threshold at 2 years CA   | Binary                     | Logistic regression       | 71.5%                        | 62.3%       | 53.7%           | 34.2%     |
| ASQ gross motor score below threshold at 2 years CA     | Binary                     | Logistic regression       | 71.8%                        | 62.8%       | 54.3%           | 35.1%     |
| ASQ fine motor score below threshold at 2 years CA      | Binary                     | Logistic regression       | 71.8%                        | 62.8%       | 54.3%           | 35.1%     |
| ASQ problem-solving score below threshold at 2 years CA | Binary                     | Logistic regression       | 72.3%                        | 63.5%       | 55.2%           | 36.4%     |
| ASQ personal-social score below threshold at 2 years CA | Binary                     | Logistic regression       | 72.0%                        | 63.0%       | 54.6%           | 35.5%     |
