# Supplementary material for: Intensity of perinatal care, extreme prematurity and sensorimotor outcome at 2 years corrected age: evidence from the EPIPAGE-2 cohort study
Source: Springer Nature journal article supplement (doi:10.1186/s12916-018-1206-4), 2018-12-01
Supplement: MOESM3 [file 16317052]

## RESEARCH

# S3 Appendix: sensitivity analyses using a baseline of 24 to 26 weeks gestational age

Andrei S Morgan<sup>1,2,3\*</sup>, Laurence Foix L'Helias<sup>1,4,5</sup>, Caroline Diguisto<sup>1,6,7</sup>, Laetitia Marchand-Martin<sup>1</sup>, Monique Kaminski<sup>1</sup>, Babak Khoshnood<sup>1</sup>, Jennifer Zeitlin<sup>1</sup>, Gérard Bréart<sup>1</sup>, Xavier Durrmeyer<sup>1,8</sup>, François Goffinet<sup>1,9</sup> and Pierre-Yves Ancel<sup>1,10</sup>

\*Correspondence:

[andrei.morgan@inserm.fr](mailto:andrei.morgan@inserm.fr)

<sup>1</sup>INSERM UMR 1153, Obstetrical, Perinatal and Pediatric Epidemiology Research Team (EPOPé), Centre for Epidemiology and Statistics Sorbonne Paris Cité, DHU Risks in Pregnancy, Paris Descartes University, Hôpital Tenon, Rue de la Chine, 75020 Paris, France

Full list of author information is available at the end of the article

Table 1: Factors associated with active perinatal care according to perinatal care intensity level.

| Variable                   | Low |       | Medium |       | High |       | P value |
|----------------------------|-----|-------|--------|-------|------|-------|---------|
|                            | n   | %     | n      | %     | n    | %     |         |
| Antenatal steroids (N=838) |     |       |        |       |      |       |         |
| No                         | 92  | 36.08 | 76     | 26.48 | 41   | 13.85 | <0.001  |
| Yes                        | 163 | 63.92 | 211    | 73.52 | 255  | 86.15 |         |
| In utero transfer (N=853)  |     |       |        |       |      |       |         |
| No                         | 129 | 48.31 | 136    | 46.9  | 126  | 42.57 | 0.356   |
| Yes                        | 138 | 51.69 | 154    | 53.1  | 170  | 57.43 |         |
| Tocolysis (N=852)          |     |       |        |       |      |       |         |
| No                         | 137 | 51.12 | 103    | 35.76 | 85   | 28.72 | <0.001  |
| Yes                        | 131 | 48.88 | 185    | 64.24 | 211  | 71.28 |         |
| MgSO4 usage (N=839)        |     |       |        |       |      |       |         |
| No                         | 243 | 91.01 | 269    | 95.39 | 271  | 93.45 | 0.12    |
| Yes                        | 24  | 8.99  | 13     | 4.61  | 19   | 6.55  |         |
| Mode of delivery (N=786)   |     |       |        |       |      |       |         |
| Caesarean                  | 91  | 39.22 | 121    | 45.32 | 121  | 42.16 | 0.388   |
| Vaginal                    | 141 | 60.78 | 146    | 54.68 | 166  | 57.84 |         |
| Baby resuscitated (N=728)  |     |       |        |       |      |       |         |
| No                         | 46  | 22.01 | 16     | 6.72  | 15   | 5.34  | <0.001  |
| Yes                        | 163 | 77.99 | 222    | 93.28 | 266  | 94.66 |         |

Table 2: Maternal and neonatal characteristics by perinatal care intensity level.

| Variable                                              | Levels                                                  | Low |       | Medium |       | High |       | P value |
|-------------------------------------------------------|---------------------------------------------------------|-----|-------|--------|-------|------|-------|---------|
|                                                       |                                                         | n   | %     | n      | %     | n    | %     |         |
| Gestational age (N=880)                               | 24                                                      | 88  | 31.88 | 79     | 26.69 | 50   | 16.23 | <0.001  |
|                                                       | 25                                                      | 75  | 27.17 | 103    | 34.8  | 115  | 37.34 |         |
|                                                       | 26                                                      | 113 | 40.94 | 114    | 38.51 | 143  | 46.43 |         |
| Multiple pregnancy (N=880)                            | no                                                      | 201 | 72.83 | 198    | 66.89 | 216  | 70.13 | 0.301   |
|                                                       | yes                                                     | 75  | 27.17 | 98     | 33.11 | 92   | 29.87 |         |
| Fetal sex (N=878)                                     | male                                                    | 142 | 51.64 | 139    | 47.12 | 146  | 47.4  | 0.484   |
|                                                       | female                                                  | 133 | 48.36 | 156    | 52.88 | 162  | 52.6  |         |
| Maternal age group (N=878)                            | <25 years                                               | 62  | 22.46 | 48     | 16.22 | 56   | 18.3  | 0.201   |
|                                                       | 25-29 years                                             | 77  | 27.9  | 96     | 32.43 | 106  | 34.64 |         |
|                                                       | 30-34 years                                             | 72  | 26.09 | 94     | 31.76 | 86   | 28.1  |         |
|                                                       | >=35 years                                              | 65  | 23.55 | 58     | 19.59 | 58   | 18.95 |         |
| Mother born outside of France (N=830)                 | No                                                      | 182 | 71.65 | 212    | 77.37 | 220  | 72.85 | 0.279   |
|                                                       | Yes                                                     | 72  | 28.35 | 62     | 22.63 | 82   | 27.15 |         |
| Single mother (N=830)                                 | Yes                                                     | 30  | 11.41 | 31     | 11.19 | 28   | 9.66  | 0.764   |
|                                                       | No                                                      | 233 | 88.59 | 246    | 88.81 | 262  | 90.34 |         |
| Family SES (N=780)                                    | Professional                                            | 57  | 23.27 | 42     | 16.28 | 76   | 27.44 | 0.156   |
|                                                       | Intermediate                                            | 47  | 19.18 | 47     | 18.22 | 42   | 15.16 |         |
|                                                       | Administrative, public service, self-employed, students | 59  | 24.08 | 79     | 30.62 | 66   | 23.83 |         |
|                                                       | Shop assistants, service workers                        | 34  | 13.88 | 32     | 12.4  | 37   | 13.36 |         |
|                                                       | Manual workers                                          | 34  | 13.88 | 37     | 14.34 | 42   | 15.16 |         |
|                                                       | Unemployed                                              | 14  | 5.71  | 21     | 8.14  | 14   | 5.05  |         |
| Primiparous (N=870)                                   | No                                                      | 122 | 44.85 | 129    | 44.18 | 132  | 43.14 | 0.916   |
|                                                       | Yes                                                     | 150 | 55.15 | 163    | 55.82 | 174  | 56.86 |         |
| Maternal fertility treatment (N=841)                  | No                                                      | 216 | 83.08 | 221    | 76.74 | 222  | 75.77 | 0.081   |
|                                                       | Yes                                                     | 44  | 16.92 | 67     | 23.26 | 71   | 24.23 |         |
| pPROM (N=849)                                         | No                                                      | 158 | 59.4  | 165    | 57.09 | 182  | 61.9  | 0.496   |
|                                                       | Yes                                                     | 108 | 40.6  | 124    | 42.91 | 112  | 38.1  |         |
| Chorioamnionitis diagnosed <48hrs to delivery (N=751) | No                                                      | 147 | 65.33 | 172    | 68.53 | 207  | 75.27 | 0.044   |
|                                                       | Yes                                                     | 78  | 34.67 | 79     | 31.47 | 68   | 24.73 |         |
| SGA (N=846)                                           | Yes                                                     | 69  | 26.54 | 63     | 22.11 | 80   | 26.58 | 0.368   |
|                                                       | No                                                      | 191 | 73.46 | 222    | 77.89 | 221  | 73.42 |         |
| Spontaneous labour (N=758)                            | none                                                    | 63  | 28.51 | 68     | 26.56 | 75   | 26.69 | 0.869   |
|                                                       | spontaneous                                             | 158 | 71.49 | 188    | 73.44 | 206  | 73.31 |         |
| Spontaneous rupture of membranes (N=785)              | No                                                      | 104 | 41.77 | 104    | 40.47 | 115  | 41.22 | 0.956   |
|                                                       | Yes                                                     | 145 | 58.23 | 153    | 59.53 | 164  | 58.78 |         |
| Foetal presentation (N=770)                           | cephalic                                                | 119 | 53.36 | 144    | 55.17 | 155  | 54.2  | 0.203   |
|                                                       | breech                                                  | 96  | 43.05 | 97     | 37.16 | 119  | 41.61 |         |
|                                                       | other                                                   | 8   | 3.59  | 20     | 7.66  | 12   | 4.2   |         |

Table 3: Numbers and percentages of participants with confidence intervals by level of intensity.

|                           | Perinatal intensity level |      |               |        |      |               |      |      |               |
|---------------------------|---------------------------|------|---------------|--------|------|---------------|------|------|---------------|
|                           | Low                       |      |               | Medium |      |               | High |      |               |
|                           | n                         | %    | (95%CI)       | n      | %    | (95%CI)       | n    | %    | (95%CI)       |
| Fetal admissions          | 276                       | —    | —             | 296    | —    | —             | 308  | —    | —             |
| Live births               | 215                       | 77.9 | (72.4 – 82.6) | 247    | 83.4 | (78.6 – 87.4) | 286  | 92.9 | (89.2 – 95.4) |
| Admitted to NICU          | 171                       | 62.0 | (55.9 – 67.7) | 221    | 74.7 | (69.2 – 79.4) | 273  | 88.6 | (84.4 – 91.9) |
| Alive at 2 years          | 126                       | 45.7 | (39.7 – 51.7) | 140    | 47.3 | (41.5 – 53.2) | 206  | 66.9 | (61.3 – 72.1) |
| CP (n responding)         | 108                       | —    | —             | 115    | —    | —             | 170  | —    | —             |
| CP/sensory deficiency     | 7                         | 6.5  | (2.9 – 13.4)  | 8      | 7.0  | (3.3 – 13.7)  | 10   | 5.9  | (3.0 – 10.9)  |
| <b>Imputed population</b> | 126                       | —    | —             | 140    | —    | —             | 207  | —    | —             |
| CP/Sensory deficiency     | —                         | 6.9  | (4.7 – 9.2)   | —      | 7.7  | (5.4 – 9.9)   | —    | 7.2  | (5.4 – 9.0)   |

Imputed percentages were averaged across the 60 imputed data sets using Rubin's rule.[1]

Table 4: Sensorimotor outcomes at two years of age amongst survivors of babies born at 24-26 weeks gestation in medium and high intensity units compared to low intensity units in France in 2011.

| Model                            | n   | Medium intensity |               | High intensity |               |
|----------------------------------|-----|------------------|---------------|----------------|---------------|
|                                  |     | OR               | (95% CI)      | OR             | (95% CI)      |
| <b>Complete cases</b>            |     |                  |               |                |               |
| Unadjusted                       | 393 | 1.08             | (0.38 – 3.08) | 0.90           | (0.33 – 2.45) |
| Baseline + GA                    | 393 | 0.84             | (0.28 – 2.47) | 0.73           | (0.26 – 2.02) |
| Baseline + GA + multiple status  | 393 | 0.86             | (0.28 – 2.61) | 0.74           | (0.26 – 2.11) |
| Baseline + extra variables       | 309 | 0.67             | (0.17 – 2.68) | 0.82           | (0.24 – 2.82) |
| <b>After multiple imputation</b> |     |                  |               |                |               |
| Baseline                         | 472 | 1.12             | (0.40 – 3.15) | 1.04           | (0.39 – 2.72) |
| Baseline + GA                    | 472 | 0.92             | (0.32 – 2.68) | 0.87           | (0.32 – 2.34) |
| Baseline + GA + multiple status  | 472 | 1.00             | (0.34 – 2.96) | 0.92           | (0.34 – 2.50) |
| Baseline + extra variables       | 472 | 0.91             | (0.28 – 2.99) | 1.02           | (0.35 – 2.99) |

95% CI: 95% confidence interval. GA: gestational age. Extra variables: GA + multiple status + fetal sex + maternal age + family SES + fertility treatment + chorioamnionitis + labour type + SGA + premature rupture of membranes.

Table 5: Survival without sensorimotor disability at two years of age in populations delivered at 24–26 weeks gestation.

| Population      | Model                                           | Medium intensity |               | High intensity |               |
|-----------------|-------------------------------------------------|------------------|---------------|----------------|---------------|
|                 |                                                 | OR               | (95% CI)      | OR             | (95% CI)      |
| Fetuses         | Baseline (unadjusted)                           | 1.08             | (0.69 – 1.68) | 2.40           | (1.53 – 3.78) |
|                 | Baseline + GA                                   | 1.05             | (0.68 – 1.62) | 2.09           | (1.35 – 3.23) |
|                 | Baseline + GA + multiple status                 | 1.00             | (0.65 – 1.53) | 2.06           | (1.34 – 3.15) |
|                 | Baseline + GA + multiple status + extra factors | 1.01             | (0.65 – 1.59) | 2.14           | (1.37 – 3.34) |
| Live births     | Baseline (unadjusted)                           | 0.94             | (0.57 – 1.54) | 1.77           | (1.08 – 2.90) |
|                 | Baseline + GA                                   | 0.92             | (0.57 – 1.48) | 1.74           | (1.08 – 2.81) |
|                 | Baseline + GA + multiple status                 | 0.87             | (0.55 – 1.39) | 1.71           | (1.07 – 2.73) |
|                 | Baseline + GA + multiple status + extra factors | 0.90             | (0.56 – 1.46) | 1.74           | (1.08 – 2.82) |
| NICU admissions | Baseline (unadjusted)                           | 0.61             | (0.36 – 1.05) | 1.04           | (0.61 – 1.76) |
|                 | Baseline + GA                                   | 0.69             | (0.41 – 1.16) | 1.16           | (0.69 – 1.94) |
|                 | Baseline + GA + multiple status                 | 0.66             | (0.40 – 1.12) | 1.16           | (0.69 – 1.93) |
|                 | Baseline + GA + multiple status + extra factors | 0.70             | (0.41 – 1.21) | 1.16           | (0.68 – 1.98) |
| Survivors       | Baseline (unadjusted)                           | 0.90             | (0.32 – 2.53) | 0.97           | (0.37 – 2.54) |
|                 | Baseline + GA                                   | 1.08             | (0.37 – 3.14) | 1.15           | (0.43 – 3.10) |
|                 | Baseline + GA + multiple status                 | 1.00             | (0.34 – 2.98) | 1.09           | (0.40 – 2.97) |
|                 | Baseline + GA + multiple status + extra factors | 1.06             | (0.32 – 3.45) | 0.97           | (0.33 – 2.83) |

Fetuses: fetuses (babies) alive at the onset of labour/maternal admission to hospital.

GA: gestational age. Extra factors: fetal sex + maternal age + family SES + fertility treatment + chorioamnionitis + labour type + SGA + premature rupture of membranes.

**Author details**

<sup>1</sup>INSERM UMR 1153, Obstetrical, Perinatal and Pediatric Epidemiology Research Team (EPOPé), Centre for Epidemiology and Statistics Sorbonne Paris Cité, DHU Risks in Pregnancy, Paris Descartes University, Hôpital Tenon, Rue de la Chine, 75020 Paris, France. <sup>2</sup>Institute for Womens' Health, UCL, 74 Huntley Street, WC1E 6AU, London, UK. <sup>3</sup>SAMU 93 - SMUR Pédiatrique, CHI André Gregoire, Groupe Hospitalier Universitaire Paris Seine-Saint-Denis, Assistance Publique des Hôpitaux de Paris, Montreuil, France. <sup>4</sup>UPMC Université Paris 6, Sorbonne Universités, Paris, France. <sup>5</sup>Service de Néonatalogie, Hopital Armand Trousseau, Assistance Publique des Hôpitaux de Paris, Paris, France. <sup>6</sup>Maternité Olympe de Gouges, Centre Hospitalier Regional Universitaire Tours, Tours, France. <sup>7</sup>Université François Rabelais, Tours, France. <sup>8</sup>Service de Médecine Néonatale, Centre Hospitalier Intercommunal de Creteil, Clinical Research Center CHI Créteil, Créteil, France. <sup>9</sup>Maternité Port-Royal, University Paris-Descartes, Hôpitaux Universitaires Paris Centre, Assistance Publique des Hôpitaux de Paris, Paris, France. <sup>10</sup>URC CIC P1419, DHU Risk in Pregnancy, Cochin Hotel Dieu, Assistance Publique des Hôpitaux de Paris, Paris, France.

**References**

1. Rubin, D.B.: Multiple Imputation for Nonresponse in Surveys. John Wiley & Sons, Inc., USA (1987). doi:[10.1002/9780470316696.fmatter](https://doi.org/10.1002/9780470316696.fmatter)
